# Supplementary material for: Development of an activity-based chemiluminogenic probe for γ-glutamylcyclotransferase
Source: Royal Society of Chemistry journal article supplement (doi:10.1039/d3ob00655g), 2023-01-01

## Development of an activity-based chemiluminogenic probe for $\gamma$ -glutamylcyclotransferase

Yukie Nohara<sup>[a]</sup>, Keiko Taniguchi<sup>[b]</sup>, Hiromi Ii<sup>[c]</sup>, Shun Masuda<sup>[a]</sup>, Hiroko Kawakami<sup>[a]</sup>, Masakatsu Matsumoto<sup>[d]</sup>, Yasunao Hattori<sup>[e]</sup>, Susumu Kageyama<sup>[f]</sup>, Toshiyuki Sakai<sup>[b]</sup>, Susumu Nakata\*<sup>[c]</sup>, Taku Yoshiya\*<sup>[a, g]</sup>

<sup>[a]</sup> Peptide Institute, Inc., 7-2-9 Saito-Asagi, Ibaraki-shi, Osaka 567-0085, Japan.

<sup>[b]</sup> Department of Drug Discovery Medicine, Kyoto Prefectural University of Medicine, Kajicho 465, Kawaramachi-Hirokoji Kamigyo-ku, Kyoto 602-8566, Japan.

<sup>[c]</sup> Laboratory of Clinical Oncology, Kyoto Pharmaceutical University, Misasagi-Nakauchi-cho 5, Yamashina-ku, Kyoto 607-8414, Japan.

<sup>[d]</sup> Department of Chemistry, Kanagawa University, 3-27-1 Rokkakubashi, Kanagawa-ku, Yokohama, Kanagawa, 221-8686, Japan.

<sup>[e]</sup> Center for Instrumental Analysis, Kyoto Pharmaceutical University, Misasagi-Schichonocho 1, Yamashina-ku, Kyoto 607-8412, Japan.

<sup>[f]</sup> Department of Urology, Shiga University of Medical Science, Seta Tsukinowa-cho, Otsu, Shiga 520-2192, Japan.

<sup>[g]</sup> Institute for Protein Research, Osaka University, 3-2 Yamadaoka, Suita-shi, Osaka 565-0871, Japan.

### Contents

|                                        |      |
|----------------------------------------|------|
| • Supplemental synthetic schemes       | P. 2 |
| • Stability evaluation of MAM-LISA-103 | P. 3 |
| • NMR spectra                          | P. 4 |

## Supplemental synthetic schemes

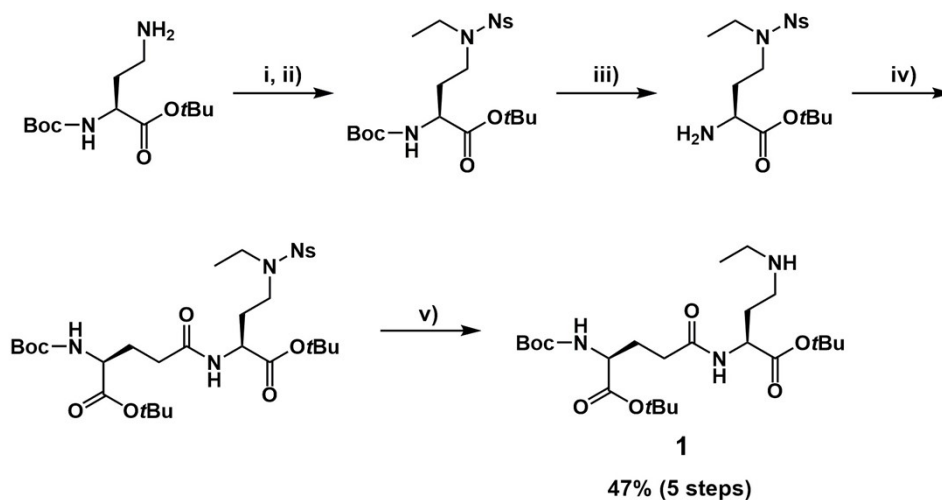

**Scheme S1.** Synthesis route of compound **1**. Reagents and conditions: i) NsCl, K<sub>2</sub>CO<sub>3</sub>, THF/H<sub>2</sub>O (2/1), ii) EtI, K<sub>2</sub>CO<sub>3</sub>, DMF, iii) 4.0 M HCl/dioxane, 0 °C, iv) Boc-Glu-OfBu, EDC•HCl, HOBT, DMF/H<sub>2</sub>O (95/5), v) LiOH•H<sub>2</sub>O, thioglycolic acid, DMF.

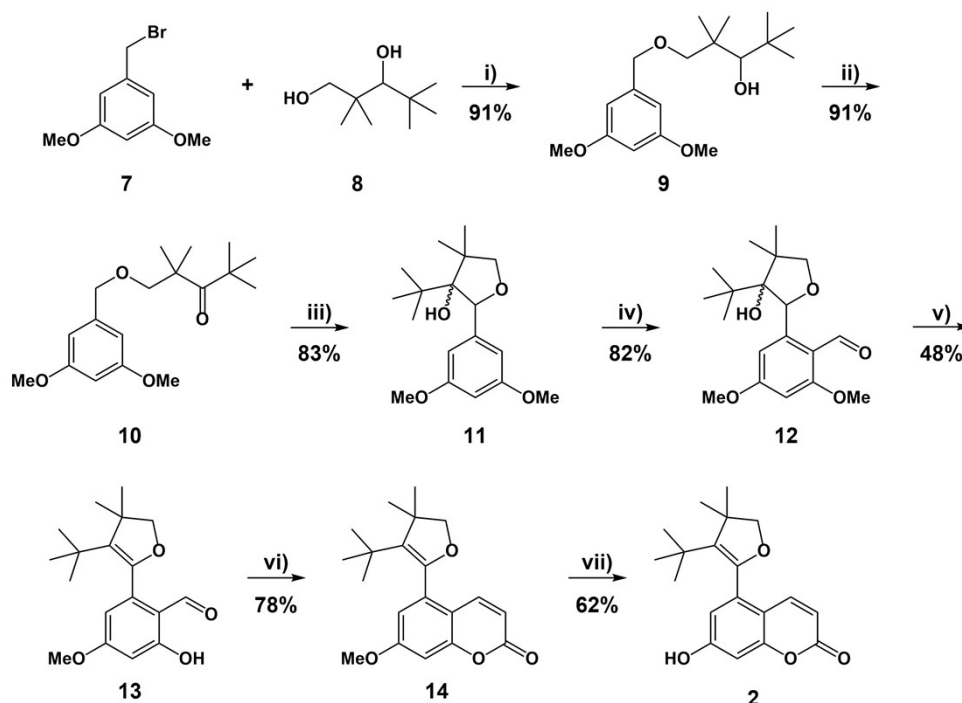

**Scheme S2.** Synthesis route of compound **2**. Reagents and conditions: i) NaH, THF, ii) PCC, CH<sub>2</sub>Cl<sub>2</sub>, iii) LDA, THF, iv) Cl<sub>2</sub>CHOCH<sub>3</sub>, AgOTf, CH<sub>2</sub>Cl<sub>2</sub>, v) BBr<sub>3</sub>, CH<sub>2</sub>Cl<sub>2</sub>, vi) PPh<sub>3</sub>CHCOOEt, *N,N*-diethylaniline, vii) AlCl<sub>3</sub>, CH<sub>2</sub>Cl<sub>2</sub>.

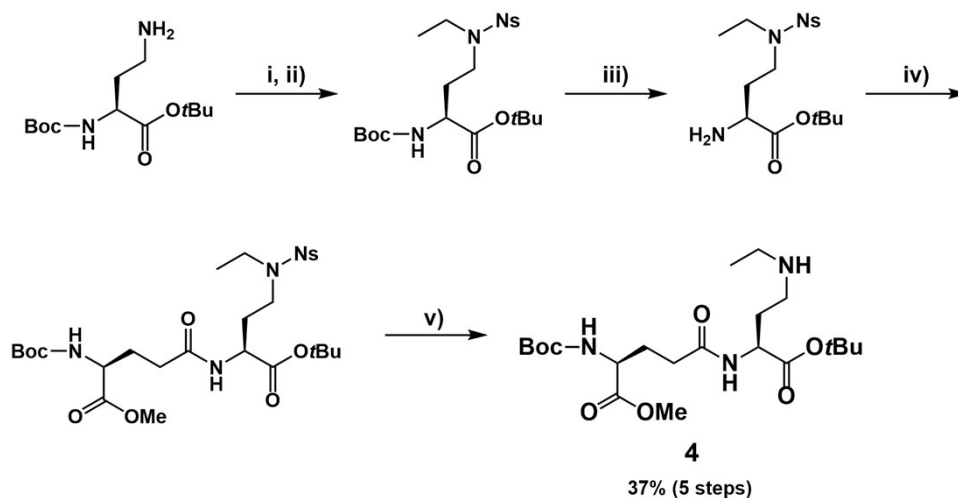

**Scheme S3.** Synthesis route of compound **4**. Reagents and conditions: i) NsCl, K<sub>2</sub>CO<sub>3</sub>, THF/H<sub>2</sub>O (2/1), ii) EtI, K<sub>2</sub>CO<sub>3</sub>, DMF, iii) 4.0 M HCl/dioxane, 0 °C, iv) Boc-Glu-OMe, EDC•HCl, HOBT, DMF/H<sub>2</sub>O (95/5), v) K<sub>2</sub>CO<sub>3</sub>, 4-mercaptophenylacetic acid, DMF.

### **Stability evaluation of MAM-LISA-103**

Compared with LISA-103, we noticed instability of MAM-LISA-103 during storage as a lyophilized powder. After consideration of several conditions, we finally found that co-existence of sucrose as a diluent can prevent decomposition of MAM-LISA-103 while the reason is unclear. As shown in Fig S1, at room temperature (accelerated test), 9% was decomposed after 7 h in the presence of sucrose, while 34% was decomposed without sucrose. Based on these results, MAM-LISA-103 was stored as a lyophilized powder with sucrose. Eventually, only 0.3% was decomposed after 6 months at -20 °C.

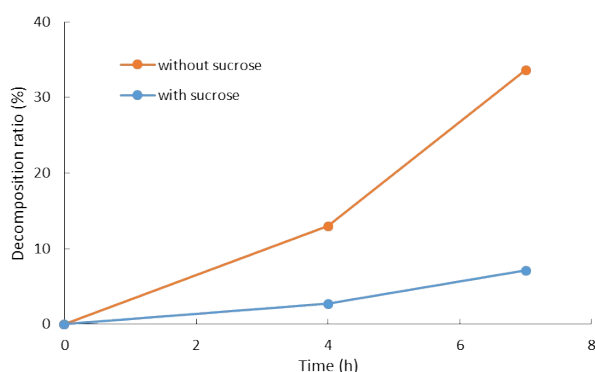

**Fig. S1** Stability comparison study of MAM-LISA-103. The decomposition ratio of MAM-LISA-103 in the lyophilized powder with or without sucrose at room temperature was evaluated by HPLC.

## NMR spectra

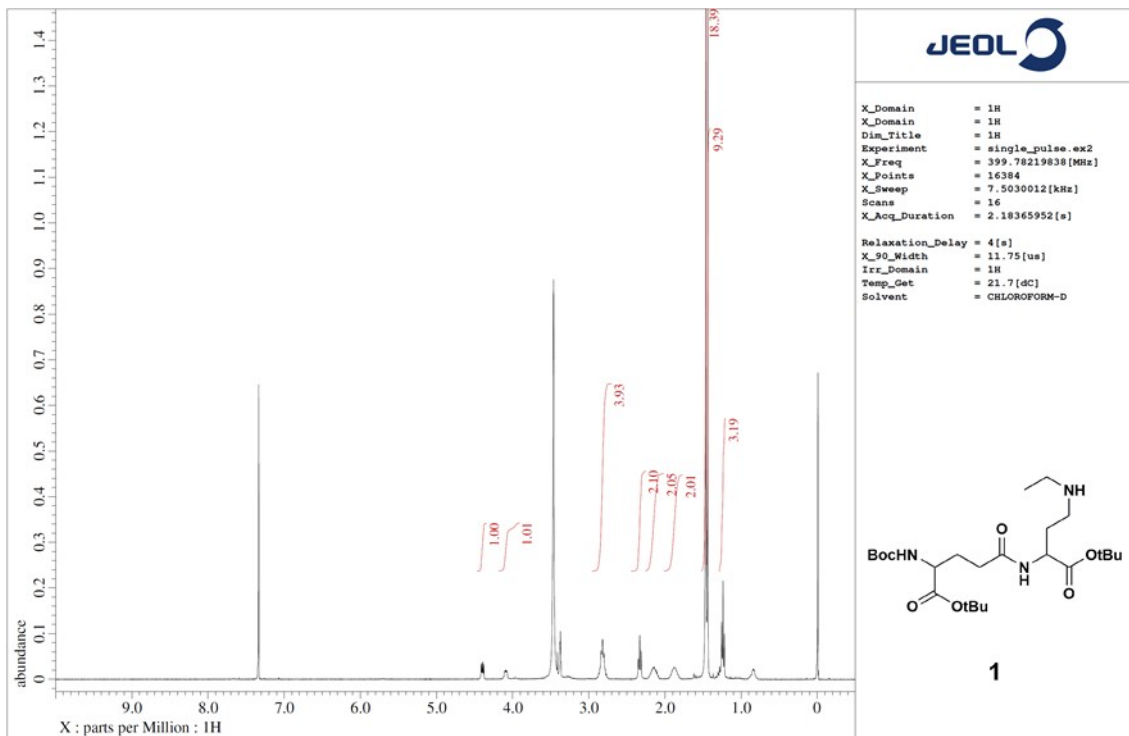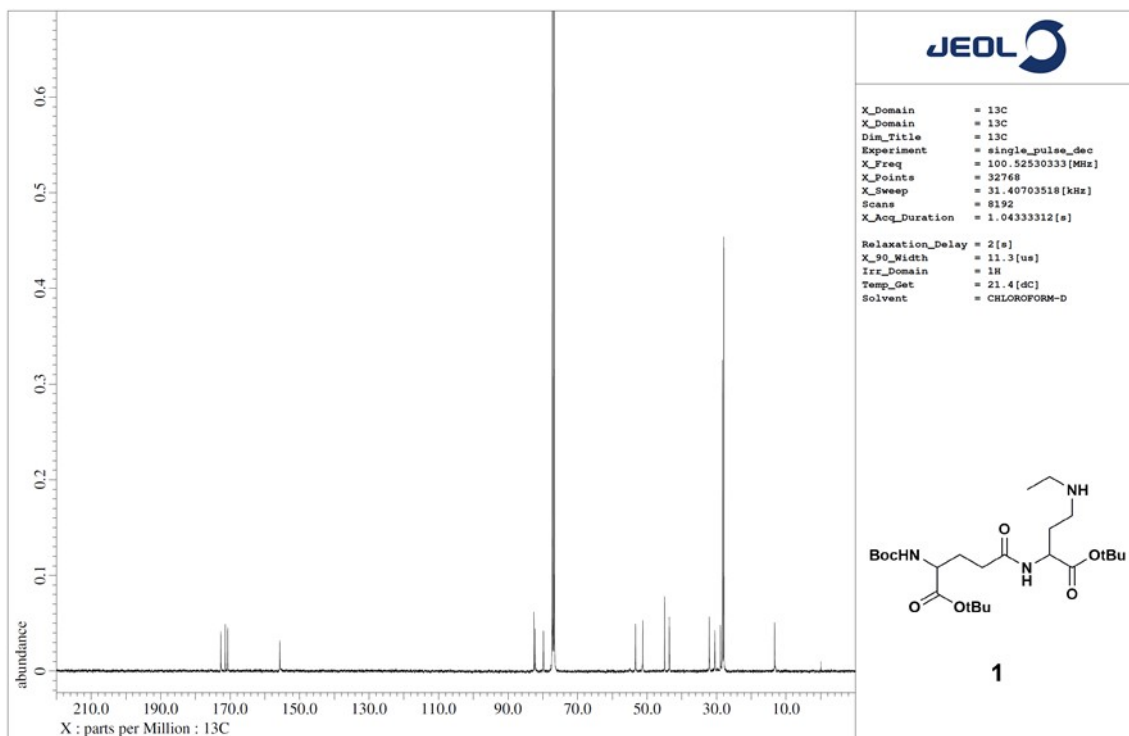

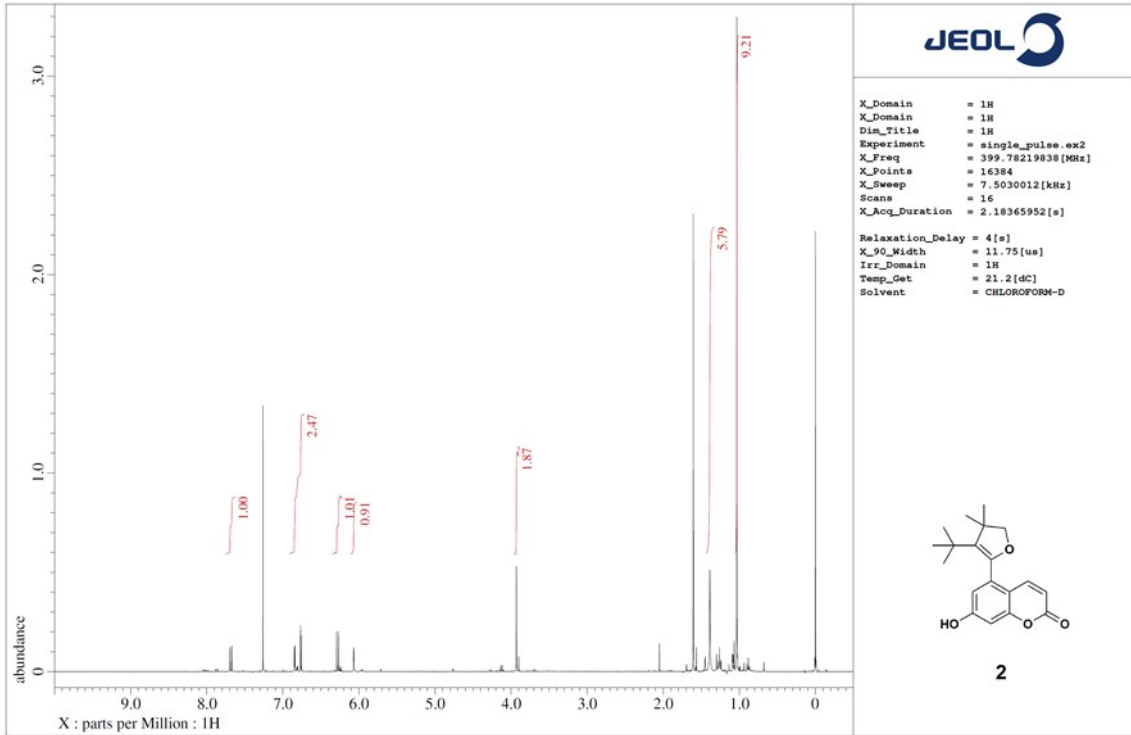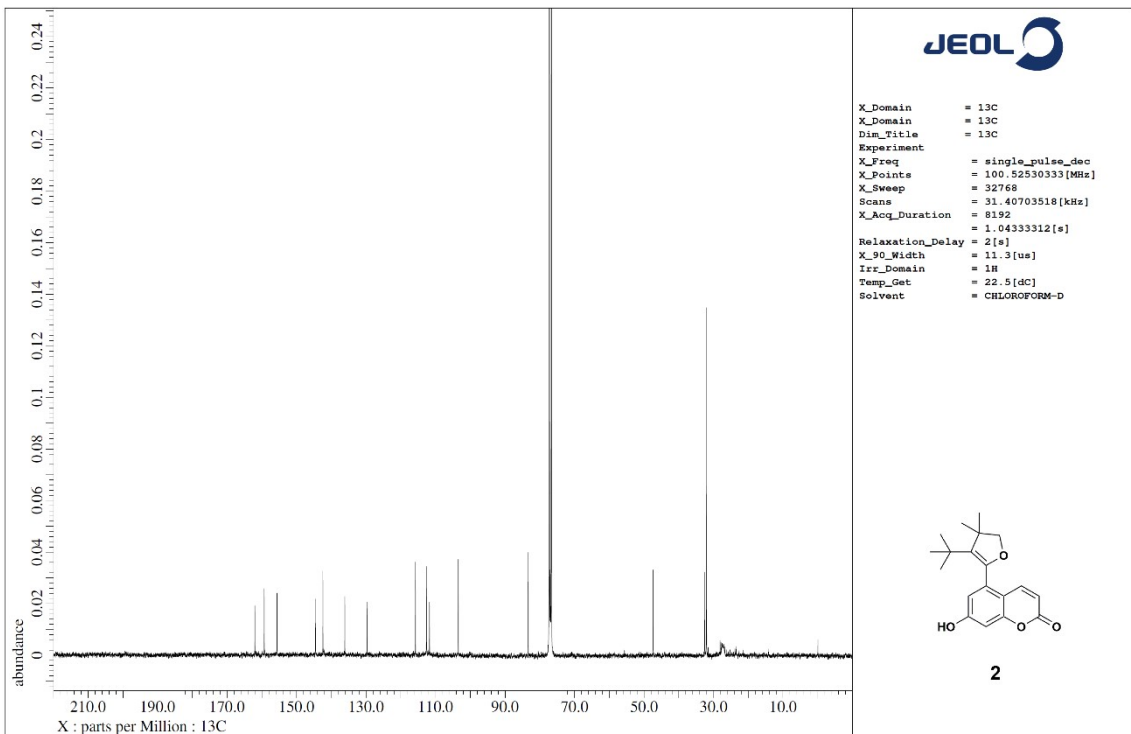

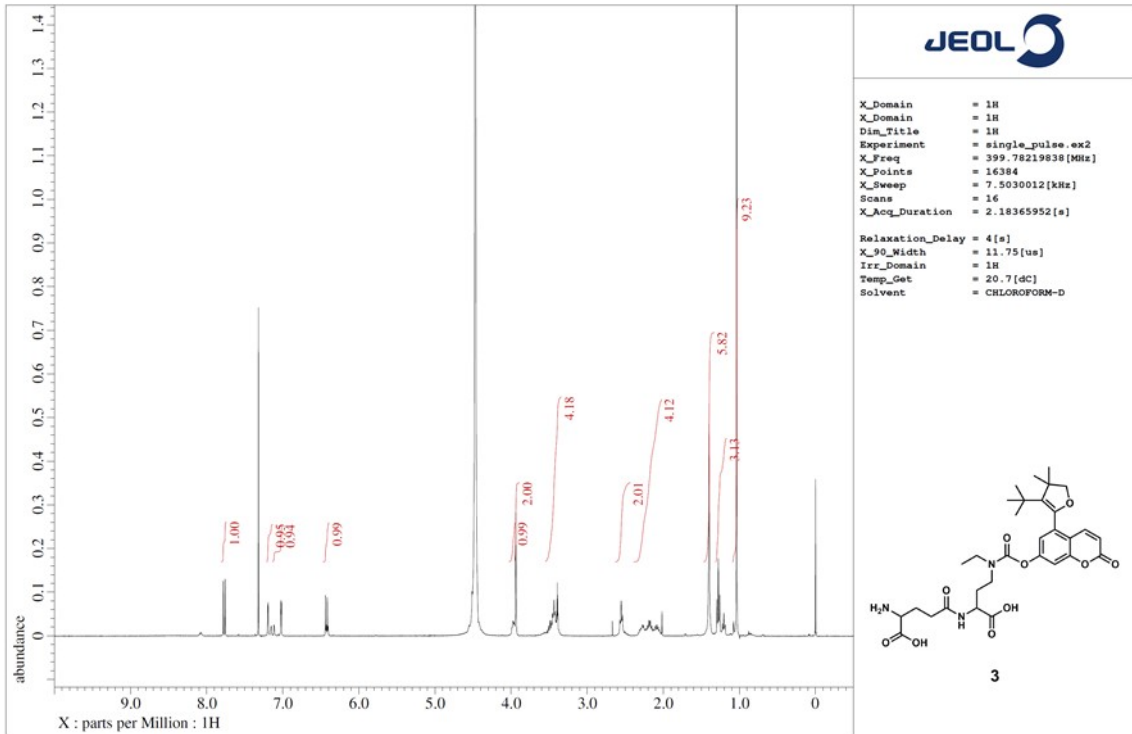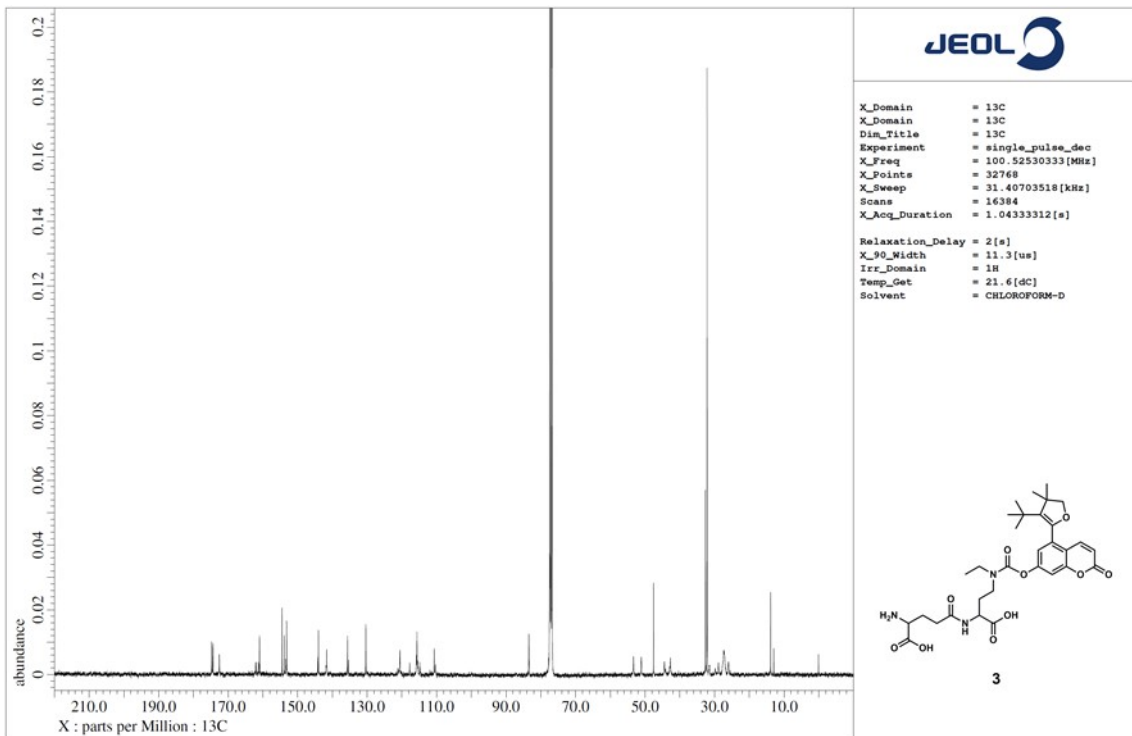

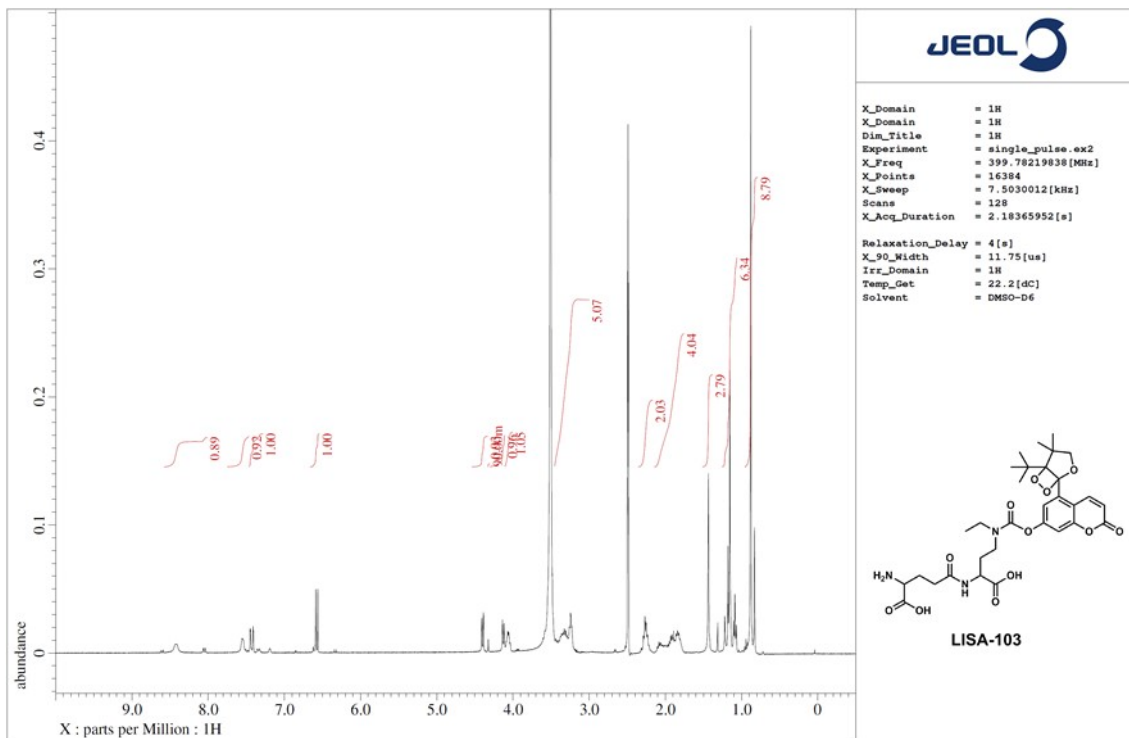

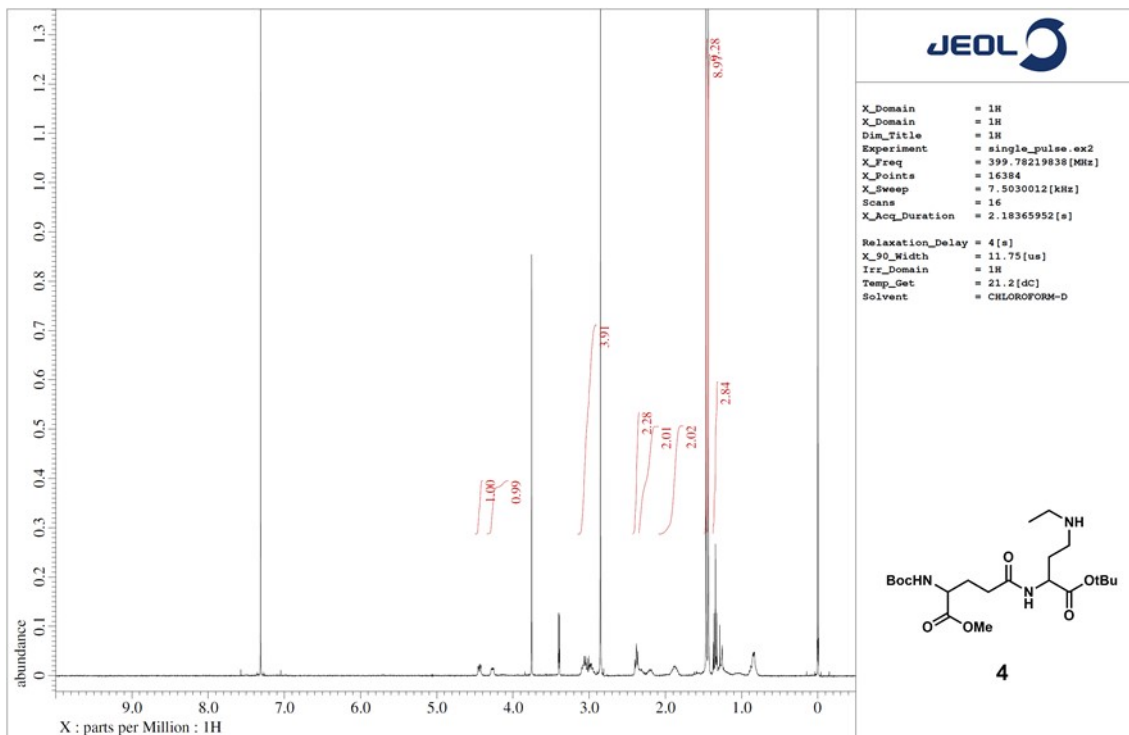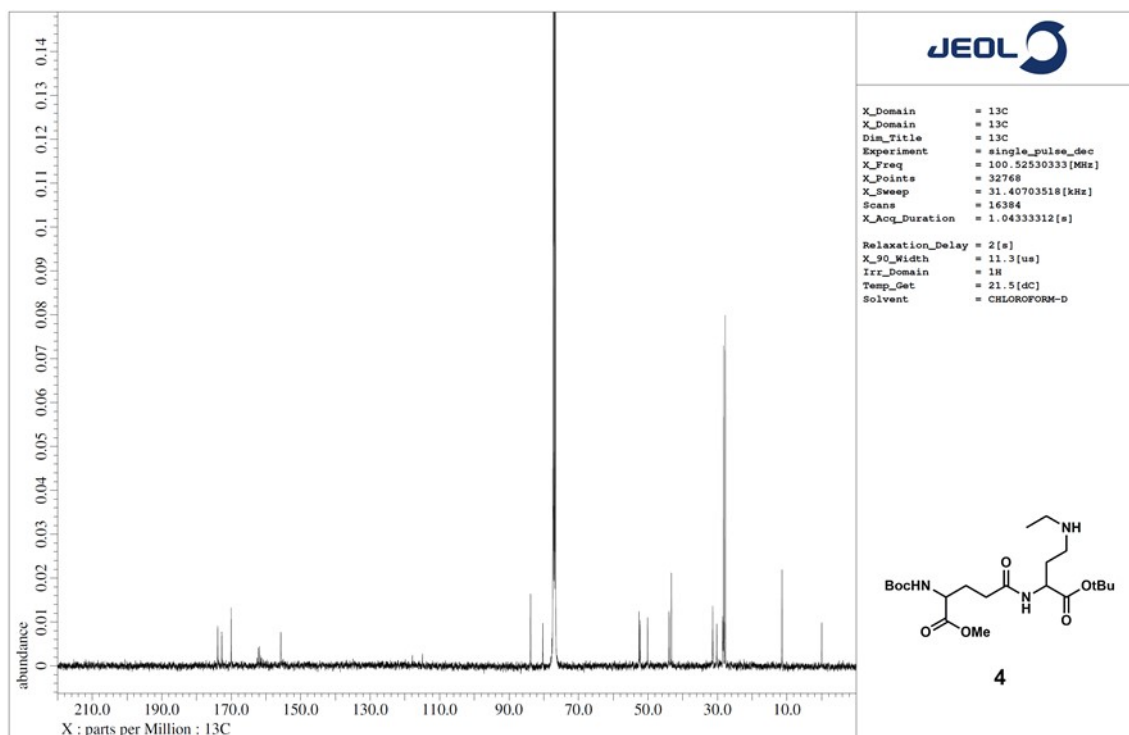



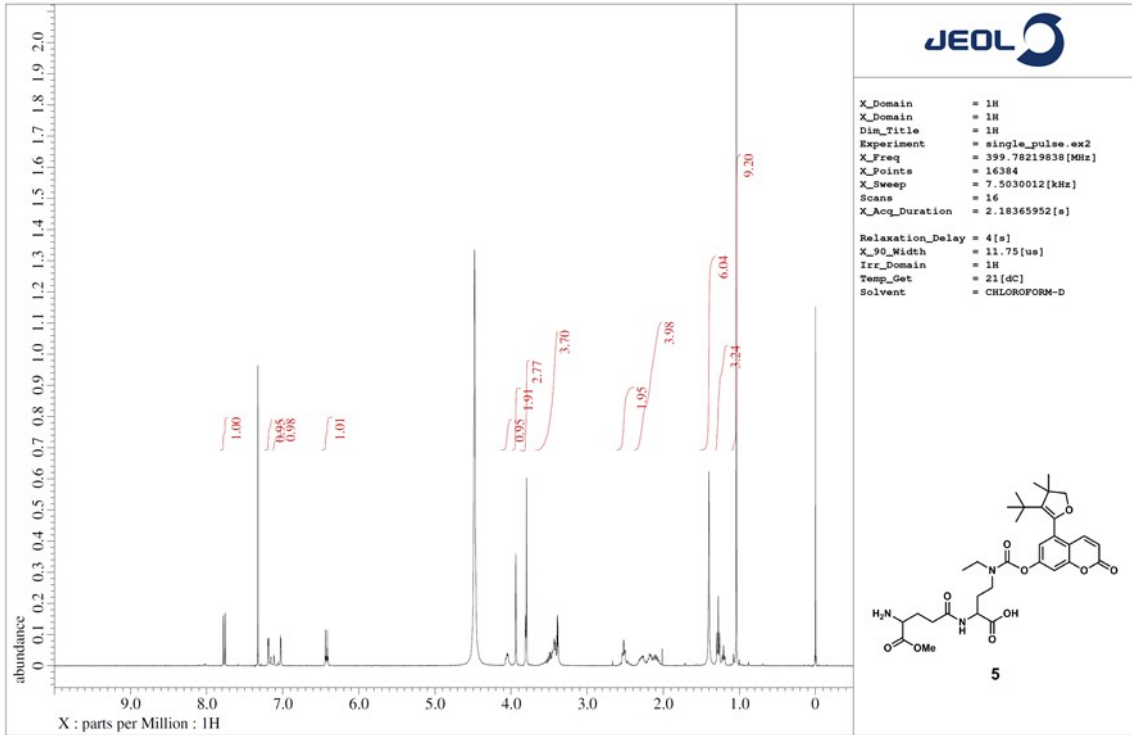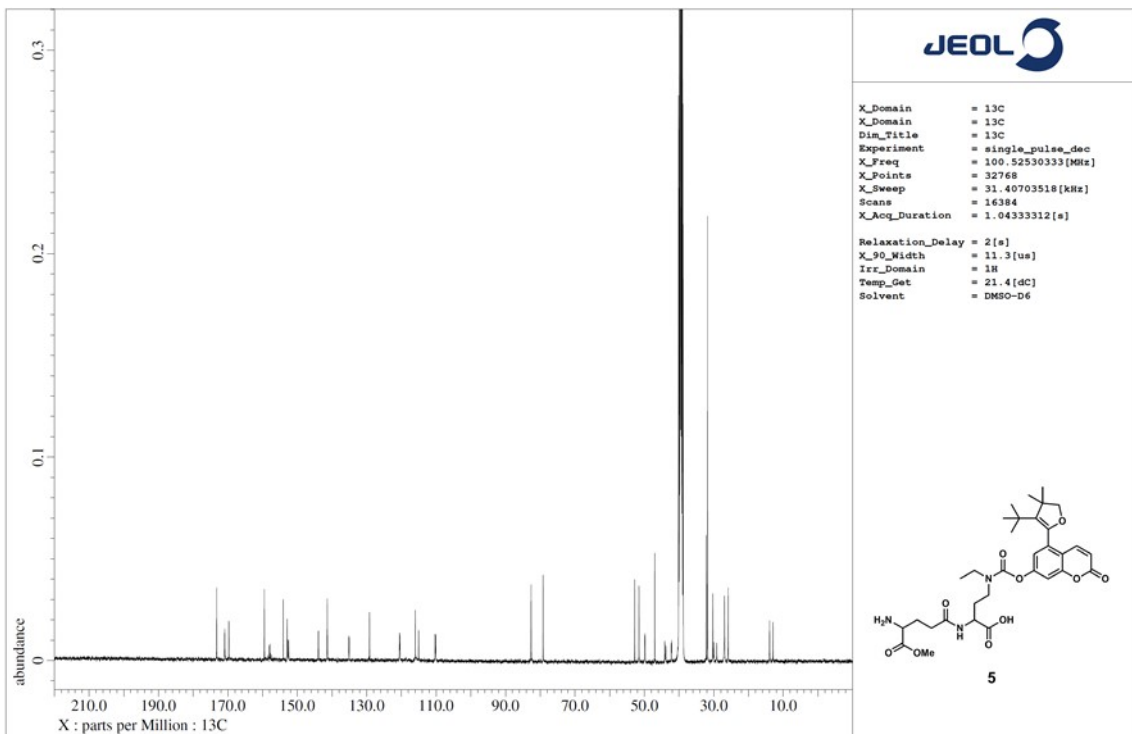

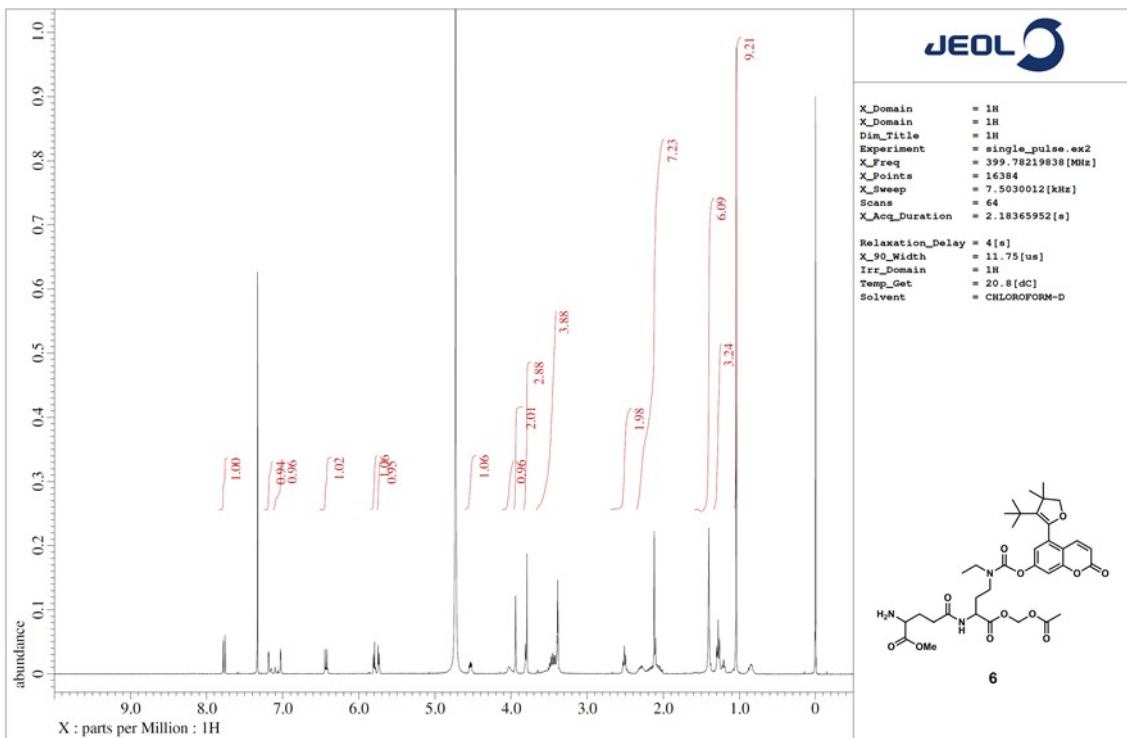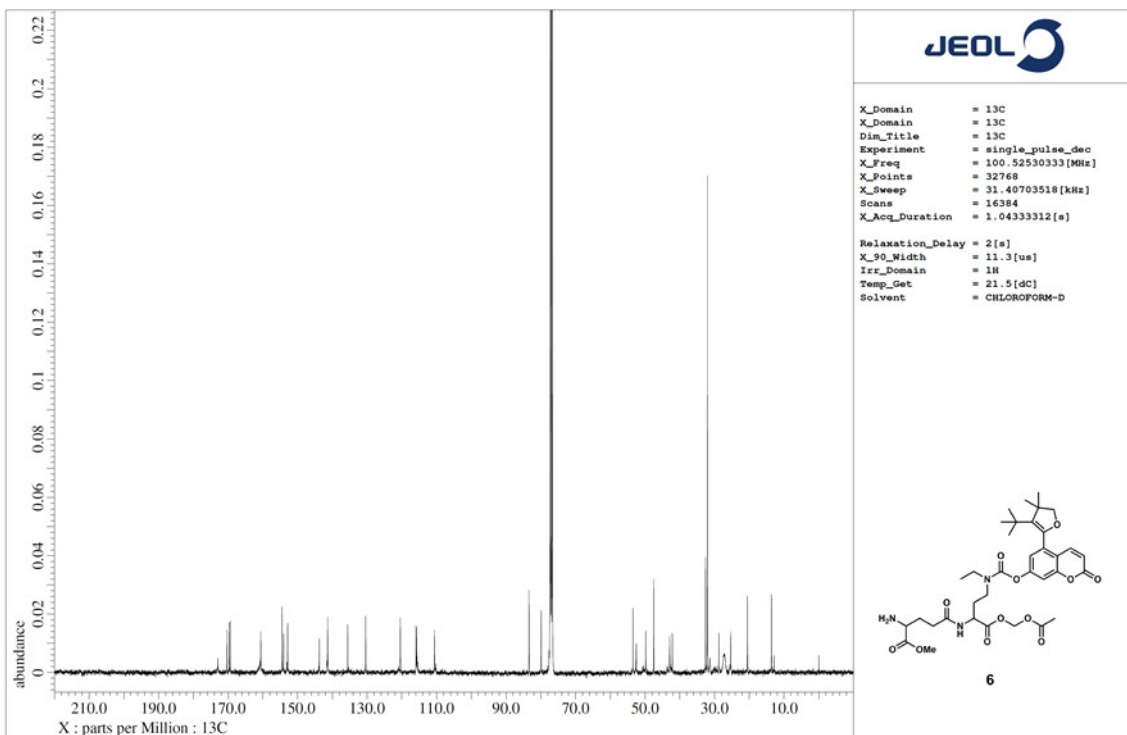

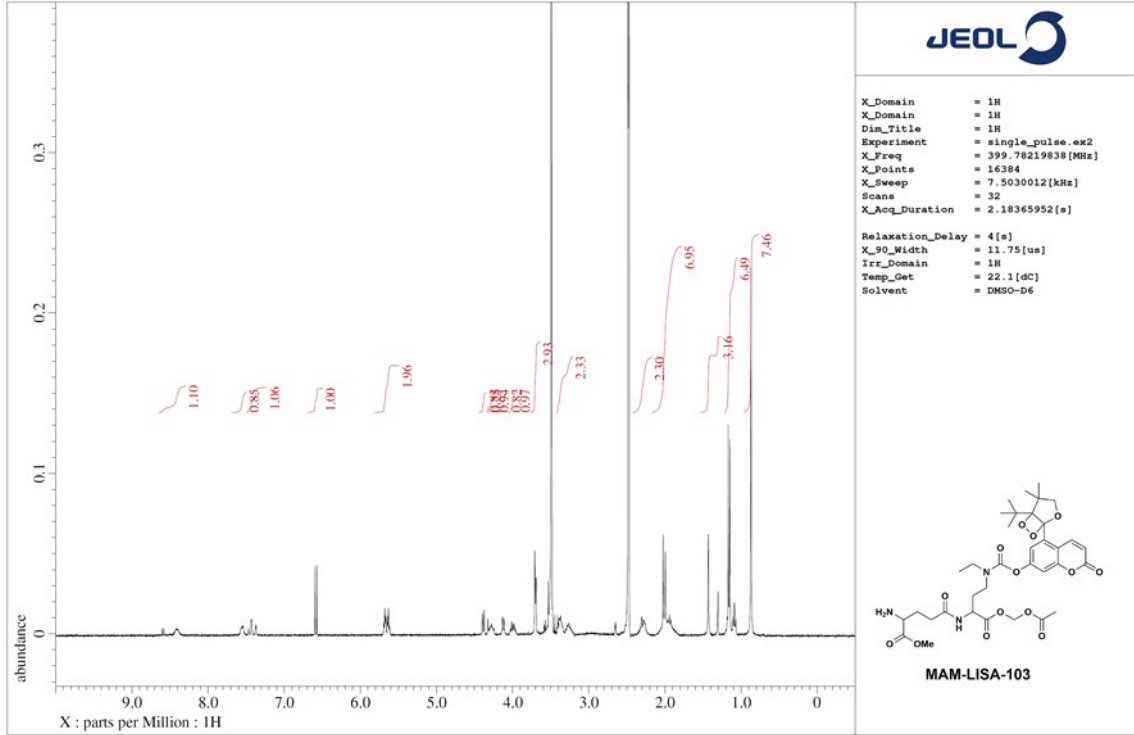

Supplement: d3ob00655g1.pdf [file d3ob00655g1.pdf]
